# Supplementary material for: Proteome Analysis of Thyroid Hormone Transporter Mct8/Oatp1c1-Deficient Mice Reveals Novel Dysregulated Target Molecules Involved in Locomotor Function
Source: MDPI journal article supplement (doi:10.3390/cells12202487), 2023-10-19
Supplement: s1 [file s1]

## Supplementary Materials

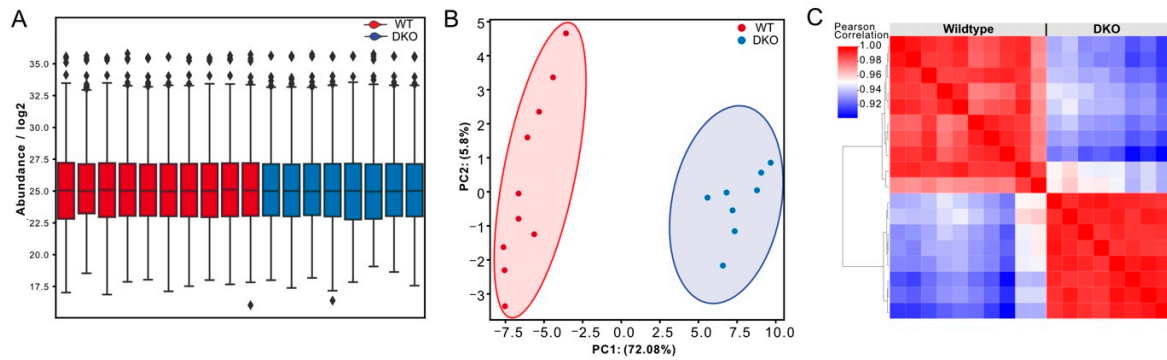

**Supplementary Figure S1.** Proteomic profiling of brain sections by LC-MS/MS data. (A) Box plot illustrating protein abundance distributions of all samples after loess normalization and imputation. (B) Principal component (PC) analysis and (C) pearson correlation clustermap with proteins filtered by  $q < 0.01$  indicate clear clustering of the samples of both conditions with no outlier samples.

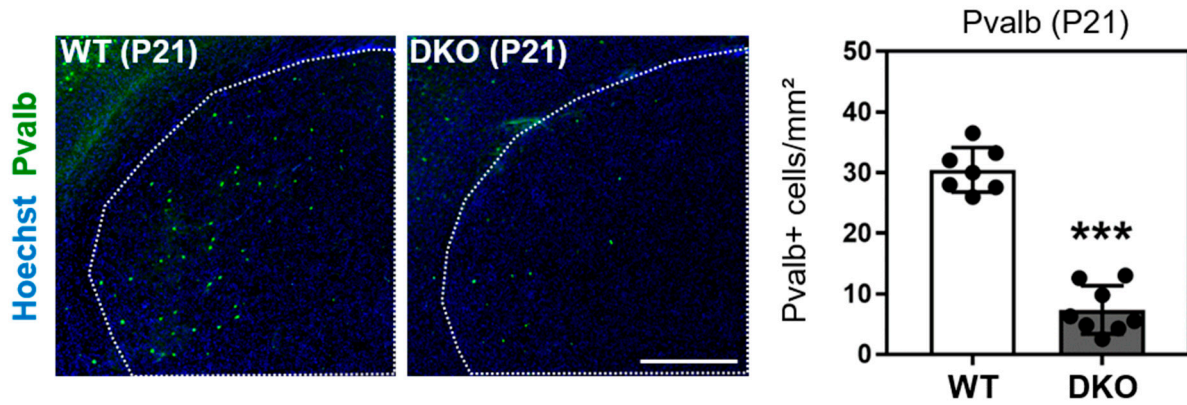

**Supplementary Figure S2.** Pvalb interneurons in the striatum. Immunofluorescent staining of Pvalb protein (in green) and enumeration of Pvalb-expressing cells demonstrating reduced values in DKO mice at P21. Hoechst33258-counterstained cell nuclei appear blue. Scale bar: 500  $\mu\text{m}$ .  $n = 7-8$ . \*\*\*,  $p < 0.001$ .
